# Supplementary material for: Potential energy surface stationary points and dynamics of the F−+ CH3I double inversion mechanism
Source: Royal Society of Chemistry journal article supplement (doi:10.1039/c7cp02998e), 2017-01-01
Supplement: c7cp02998e1.pdf [file c7cp02998e1.pdf]

**Supporting Information**

**Potential Energy Surface Stationary Points and  
Dynamics of the  $F^- + CH_3I$  Double Inversion Mechanism**

Yong-Tao Ma, Xinyou Ma, Anyang Li, Hua Guo,  
Li Yang, Jiaxu Zhang, and William L. Hase

**Table 1.**  $S_0 \rightarrow T_1$  Vertical Excitation Energies

| $S_0$ Structure <sup>a</sup>                           | $S_0 \rightarrow T_1$ Energy (ev) |                  |
|--------------------------------------------------------|-----------------------------------|------------------|
|                                                        | CCSD(T) <sup>b</sup>              | MP2 <sup>b</sup> |
| F <sup>-</sup> + CH <sub>3</sub> I                     | 4.44                              | 4.09             |
| FCH <sub>3</sub> + I <sup>-</sup>                      | 3.84                              | 3.95             |
| HF + CH <sub>2</sub> I <sup>-</sup>                    | 2.00                              | 2.06             |
| TS0                                                    | 1.69                              | 1.88             |
| TS1                                                    | 2.01                              | 2.14             |
| TS2                                                    | 2.13                              | 2.29             |
| TS3                                                    | 2.03                              | 2.15             |
| TS4                                                    | 1.79                              | 1.93             |
| TS [F <sup>-</sup> --CH <sub>3</sub> --I] <sup>-</sup> | 4.24                              | 4.85             |
| TS[F <sup>-</sup> --HCH <sub>2</sub> --I] <sup>-</sup> | 4.47                              | 4.92             |
| IM-A                                                   | 4.23                              | 5.12             |
| IM-B                                                   | 2.03                              | 2.16             |
| IM-C                                                   | 2.18                              | 2.31             |
| IM-D                                                   | 2.06                              | 2.20             |
| IM FCH <sub>3</sub> ---I <sup>-</sup>                  | 4.12                              | 4.25             |
| IM F <sup>-</sup> ---CH <sub>3</sub> I                 | 4.75                              | 4.96             |

a. The  $S_0$  structures for TS0 to TS4 are in Figure 2. The structures for the TSs [F<sup>-</sup>--CH<sub>3</sub>--I]<sup>-</sup> and [F<sup>-</sup>--HCH<sub>2</sub>--I]<sup>-</sup> are in Figure 4. The structures for intermediates IM-A to IM-D are in Figure 2. The structures for the intermediates FCH<sub>3</sub>---I<sup>-</sup> and F<sup>-</sup>---CH<sub>3</sub>I are in Figure 4. Figures 2 and 4 are in the article.

b. The ECP/d basis set was used.
